1 Verification of *Hypsibius exemplaris* Gąsiorek et al., 2018 (Eutardigrada; Hypsibiidae)  
2 application in anhydrobiosis research

3

4 Izabela Poprawa<sup>1</sup>, Tomasz Bartylak<sup>2,3</sup>, Adam Kulpla<sup>4,5</sup>, Weronika Erdmann<sup>2</sup>, Milena  
5 Roszkowska<sup>3</sup>, Łukasz Chajec<sup>1</sup>, Łukasz Kaczmarek<sup>2\*</sup>, Andonis Karachitos<sup>3</sup>, Hanna Kmita<sup>3</sup>

6

7 <sup>1</sup>Institute of Biology, Biotechnology and Environmental Protection, Faculty of Natural  
8 Sciences, University of Silesia in Katowice, Bankowa 9, 40-007 Katowice, Poland

9 <sup>2</sup>Department of Animal Taxonomy and Ecology, Faculty of Biology, Adam Mickiewicz  
10 University in Poznań, Uniwersytetu Poznańskiego 6, 61-614 Poznań, Poland

11 <sup>3</sup>Department of Bioenergetics, Faculty of Biology, Adam Mickiewicz University in Poznań,  
12 Uniwersytetu Poznańskiego 6, 61-614, Poznań, Poland

13 <sup>4</sup>Center for Advanced Technology, Adam Mickiewicz University, Uniwersytetu Poznańskiego  
14 10, 61-614 Poznań, Poland

15 <sup>5</sup>Faculty of Biology, Adam Mickiewicz University in Poznań, Uniwersytetu Poznańskiego 6,  
16 61-614 Poznań, Poland

17 \*corresponding author: [kaczmar@amu.edu.pl](mailto:kaczmar@amu.edu.pl)

18

19 **Abstract:** Anhydrobiosis is considered to be an adaptation of important applicative implications because it enables  
20 resistance to the lack of water. The phenomenon is still not well understood at molecular level. Thus, a good model  
21 invertebrate species for the research is required. The best known anhydrobiotic invertebrates are tardigrades  
22 (Tardigrada), considered to be toughest animals in the world. *Hypsibius. exemplaris* is one of the best studied  
23 tardigrade species, with its name “*exemplaris*” referring to the widespread use of the species as a laboratory model  
24 for various types of research. However, available data suggest that anhydrobiotic capability of the species may be  
25 overestimated. Therefore, we determined anhydrobiosis survival by *Hys. exemplaris* specimens using three  
26 different anhydrobiosis protocols. We also checked ultrastructure of storage cells within formed dormant structures  
27 (tuns) that has not been studied yet for *Hys. exemplaris*. These cells are known to support energetic requirements  
28 of anhydrobiosis. The obtained results indicate that *Hys. exemplaris* appears not to be a good model species for  
29 anhydrobiosis research.

30

31 **Keywords:** cryptobiosis, model species, Tardigrada

32

## 33 **Introduction**

34           One of the most prevalent adaptations to water deficiency is anhydrobiosis, often called  
35 simply 'life without water', tolerance to desiccation or waiting for water to return [1-5]. More  
36 precisely, anhydrobiosis is described as the ability to dry to the point of equilibrium while  
37 exposed to moderately to very dry air (i.e., to 10% water content or even less) and then recover  
38 to normal functioning after rehydration without sustaining damages [6]. This denotes a series  
39 of coordinated events during dehydration and rehydration that are associated with preventing  
40 oxidative damages and maintaining the native structure at different levels of organism's  
41 organization [7-8].

42           Anhydrobiosis is also described as an adaptation to unstable environmental conditions  
43 including drought or freezing, that allows the organism to survive when the environment  
44 becomes hostile to active life. Therefore anhydrobiosis is considered to be a phenomenon of  
45 important applicative implications, enabling biostabilization and biopreservation as well as  
46 human disease treatment (e.g. [9-15]). Anhydrobiosis occurs in prokaryotes (e.g. [16]) and  
47 eukaryotes, with the latter including many microorganisms (e.g. [17]) as well as plants (e.g.  
48 [8]) and some small invertebrates (e.g. [18]). Among animals the best known example are  
49 tardigrades (e.g. [19]), indicated lately as an emerging source of knowledge of importance for  
50 medical sciences [13].

51           Tardigrade anhydrobiosis includes entry, dormant and exit stages, that correspond to the  
52 dehydration (i.e., tun formation), tun and rehydration stages, respectively [18, 20]. On the  
53 organismal level, the tun formation and return to the active stage have been quite well described  
54 and are understood fairly well [3, 21-26]. The key morphological changes during tun formation  
55 are longitudinal contraction of the body, invagination of the legs and intersegmental cuticle that  
56 are then reverted during rehydration. However, responsible cellular and molecular mechanisms  
57 are not yet fully described.

58           At the present, the genomes of only two tardigrade species are available i.e. *Hypsibius*  
59 *exemplaris* Gąsiorek, Stec, Morek & Michalczyk, 2018 [27] (previously known as *Hys.*  
60 *dujardini* (Doyère, 1840) [28] and *Ramazzottius varieornatus* Bertolani & Kinchin, 1993 [29]  
61 [30-32], both representing the eutardigrade lineage [33]. The genomes enabled identification of  
62 proteins significant for tardigrade anhydrobiosis including some intrinsically disordered  
63 proteins regarded as unique for tardigrades (for review, see [26, 34-35]). Moreover, both  
64 genomes allowed for comparative transcriptomics that corroborates experimental data  
65 indicating that different evolutionary tardigrade lineages may exhibit unique physiological and  
66 molecular adaptations to survive anhydrobiosis [36]. Accordingly, *Ram. varieornatus* is

67 regarded as more tolerant to anhydrobiosis than *Hys. exemplaris* [13, 26, 37-39]. Nevertheless,  
68 *Hys. exemplaris* is one of the best studied tardigrade species, with its name “*exemplaris*”  
69 referring to the widespread use of the species as a laboratory model for various types of studies,  
70 ranging from developmental and evolutionary biology, through physiology and anatomy to  
71 astrobiology (e.g. [27, 40-44]).

72 It is frequently suggested that *Hys. exemplaris* requires a period of preconditioning to  
73 mobilize protectants needed to undergo a successful anhydrobiosis. However, the available  
74 protocols are based on different time windows and values of relative humidity (RH) for the  
75 preconditioning and dehydration. They also differ in the applied walking surface substratum as  
76 well as rehydration process and the reported levels of recovery following rehydration ranging  
77 between ca. 22 and 100% (e.g. [37, 39, 40, 45-47]). The second approach consists in slow  
78 dehydration under conditions of decreased RH but the recovery is not stated [48]. Therefore,  
79 we decided to verify the anhydrobiotic capabilities of *Hys. exemplaris*, which is crucial for the  
80 species applicability as a model in research of anhydrobiosis. For this purpose, we tested three  
81 different protocols, i.e. the protocol based on preconditioning, published by [49], our own  
82 protocol that we also use for other tardigrade species [50] and based on slow dehydration as  
83 well as a third one we termed “environmental drying” applied in two variants, using moist sand  
84 or a pond sediment as substrates. The obtained results indicate that in *Hys. exemplaris*  
85 anhydrobiosis, slow dehydration may be a better strategy than preconditioning. However,  
86 despite being a useful model in studies of other aspects of tardigrade biology, *Hys. exemplaris*  
87 appears not to be a good model for anhydrobiosis research.

88

## 89 **Materials and Methods**

### 90 *Hypsibius exemplaris* rearing

91 *Hypsibius exemplaris* Z151 strain (Fig. 1) was purchased from Sciento (Manchester,  
92 United Kingdom) in 2015. To maintain the culture, specimens were kept in POL EKO KK 115  
93 TOP+ climate chamber (photoperiod 12h light/12h dark, 20°C, relative humidity (RH) of 50%  
94 on Petri-dishes (55 mm in diameter) with their bottoms scratched using sandpaper to allow  
95 movement of tardigrades. They were covered with a thin layer of the culture medium obtained  
96 by mixing double-distilled water and spring water (Żywiec Zdrój S.A., Poland) in ratio of 3 to  
97 1. *Chlorella vulgaris* Beijerinck 1890 [51] (SAG211-11b strain) was served as a food once per  
98 week after the dish cleaning. Animals were transferred to a new culture dishes every few months  
99 (for details see [52]). The algae strain was kindly provided by Marcin Dziuba (Department of  
100 Hydrobiology, Faculty of Biology, Adam Mickiewicz University, Poznań, Poland) and was

101 obtained from the culture collection of algae (Sammlung von Algenkulturen (SAG)) at the  
102 University of Göttingen, Germany.

103

#### 104 *Anhydrobiosis protocols*

105 For tun formation, fully active (displaying coordinated movements of the body and legs)  
106 adult *Hys. exemplaris* specimens of medium body length (approximately 200–250  $\mu\text{m}$ ) were  
107 extracted from the culture. After removal of debris, tun formation was performed using three  
108 different protocols, designated as A, B and C. In protocol A, provided by Boothby [49],  
109 specimens were transferred onto 2% agar-coated lids of Petri dishes of 3.5 cm in diameter, in  
110 the minimal amount of the culture medium. The lids, termed “agar plates”, were transferred for  
111 16 h to a humidified chamber with RH 92%, obtained by application of 10% glycerol solution  
112 in a small plastic box with a lid (Fig. 1). After the preconditioning, the agar plates were  
113 transferred to POL EKO KK 115 TOP+ chamber and kept in 40% RH for 24 h. Then, obtained  
114 tuns were kept in a desiccator for 7 days at 22% RH. All stages of tun formation were performed  
115 at controlled temperature of 20°C. Protocol B consisted in application of slow dehydration of  
116 specimens by transferring them into 3.5 cm (in diameter) covered and vented Petri dishes with  
117 qualitative filter paper CHEMLAND 150 (06-00A102.150) placed on their bottom (Fig. 1).  
118 Specimens were transferred in 400  $\mu\text{l}$  of the culture medium and were left to dry slowly in the  
119 Q-Cell incubator (40–50% RH, 20°C) for 72 h. The obtained tuns were kept in the incubator for  
120 7 days. Protocol C, termed “environmental drying” was applied in two variants, i.e. C1 and C2.  
121 In both variants specimens were placed, together with 400  $\mu\text{l}$  of the culture medium, into 3.5  
122 cm (in diameter), covered Petri dishes containing ca. 5 ml of previously autoclaved (121°C, 20  
123 minutes, 100 kPa) substrate and were left to dry in Q-Cell incubator (40–50% RH, 20°C) for 72  
124 h. The dishes were kept in incubator for 7 days following drying of the substrate. In protocol  
125 C1 the substrate consisted of terrarium sand (Vitapol), with ca 3 ml of the culture medium added  
126 to moisturize it, while in protocol C2 sediment collected from a pond near the Faculty of  
127 Biology, Adam Mickiewicz University in Poznań, Poland (52° 28' 7.3956"N; 16° 56' 1.356"E),  
128 containing soil and decomposing plant matter was used as the substrate. The numbers of  
129 specimens and repeats used for estimation of survival rate as well as substratum for each of the  
130 applied protocols are summarized in Table 1. In the case of the A and B protocols, each plate  
131 contained five additional specimens selected randomly for tun microscopic analysis (see  
132 below). In the case of the C1 and C2 protocols, microscopic analysis of tuns was impossible  
133 due to the applied walking surface substratum which made observation and extraction of tuns  
134 impossible.

135 The animals' survival rate after 24 h following rehydration was observed in small glass  
136 cubes under the stereomicroscope (Olympus SZX7 and SZ51). In case of A and B protocols,  
137 the rehydration was performed by addition of 2 ml of the culture medium to each dish. Tuns  
138 were then transferred from their dishes to separate glass cubes and kept at 20 °C, and 40–50%  
139 RH. In the case of C1 and C2 protocols, contents of each dish were placed in larger Petri dish  
140 filled with culture medium to allow extraction of animals to the separate glass cube kept at 20  
141 °C, and 40–50% RH. Successful survival was defined as the presence of coordinated movements  
142 of animal body and legs (crawling). Statistical significance of results was tested using unpaired  
143 t-test.

144

#### 145 *Tun microscopic analysis*

146 Tun formation by application of protocols A and B was observed under an Olympus  
147 SZ61 stereomicroscope connected to Olympus UC30 microscope digital camera. Randomly  
148 selected representative tuns were photographed. Tuns were fixed in solution of 2.5%  
149 glutaraldehyde in 0.1 M sodium phosphate buffer (pH 7.4, room temperature, 2 min). Then tuns  
150 obtained by protocol A were photographed on agar plates using an Olympus SZ61  
151 stereomicroscope. Tuns obtained using protocol B were fixed in 2.5% glutaraldehyde in 0.1 M  
152 sodium phosphate buffer, mounted in a drop of water on a slide, covered by coverslip, and  
153 photographed with the use of Olympus BX60 stereomicroscope and OLYMPUS DP50 camera.

154 Ten tuns obtained using protocols A and B were randomly selected for ultrastructure  
155 analysis under transmission electron microscopy (TEM). Tuns were selected just before  
156 rehydration and then fixed in 2.5% glutaraldehyde prepared in 0.1 M sodium phosphate buffer  
157 (pH 7.4, 4°C, 24 h), postfixed in 2% osmium tetroxide in 0.1 M phosphate buffer (pH 7.4, 4°C,  
158 1.5 h), dehydrated and embedded according to the protocol by [41]. The material was cut into  
159 ultrathin (50 nm) sections on a Leica Ultracut UCT25 ultramicrotome. These sections were  
160 mounted on formvar covered copper grids, stained with uranyl acetate and lead citrate, and  
161 analyzed with use of a Hitachi H500 transmission electron microscope at 75 kV.

162

## 163 **Results and Discussion**

### 164 *Applied anhydrobiosis protocols result in formation of correct tuns, but differ in survival rate*

165 The applied anhydrobiosis protocols differed from each other at tun formation  
166 (dehydration procedure) while the rehydration procedure was similar (Table 1). As shown in  
167 Figure 2, reasonable survival rate, defined as coordinated movements of the body and legs  
168 (crawling) after 24 h following rehydration, was observed for protocol B (slow dehydration on

169 filter paper). In the case of protocol C1 (environmental drying in sterile moist sand) survival  
170 was variable whereas in the case of protocol A (preconditioning on agar layer) and C2  
171 (environmental drying in pond sediment) survival was very low. To explain these differences  
172 in survival rate we decided to check the appearance of formed tuns. It should be mentioned that  
173 for C1 and C2 protocols, microscopic analysis of tuns was impossible due to the applied  
174 walking surface substratum which made observation and extraction of tuns impossible. As  
175 shown in Figure 1, protocols A and B led to contraction of the body and withdrawal of legs into  
176 the body cavity accompanied by loss of water from the body, resulting in a distinctly shrunken  
177 body shape. Thus, the protocols allowed for formation of tuns with typical appearance.  
178 However, the typical appearance did not guarantee successful return to full activity after  
179 rehydration following 7 days spent in a tun stage. Thus, typical appearance of tuns cannot be  
180 regarded as indicative of successful anhydrobiosis for *Hys. exemplaris* specimens. Therefore,  
181 we decided to analyse ultrastructure of ten randomly selected typical tuns obtained by A and B  
182 protocols.

183

#### 184 *Typical tun appearance does not rule out degeneration at ultrastructural level*

185 Ultrastructural analysis of randomly selected correctly formed tuns performed using  
186 transmission electron microscopy (TEM) was based on storage cells regarded as representative  
187 cells for this kind of analysis [25]. The obtained TEM images of storage cells allowed to assign  
188 three stages of degeneration of typical tuns: 0 – tuns with no signs of degeneration; 1 – tuns  
189 with the first signs of degeneration; 2 – tuns with highly advanced degeneration (Fig. 1 and Fig.  
190 3, Tab. 2). In stage 0, the storage cells had oval or ameboid shape and their electron-dense  
191 cytoplasm was filled with spheres of reserve material. Between the spheres, ribosomes, cisterns  
192 of rough endoplasmic reticulum, and shrunken mitochondria with electron dense matrix were  
193 visible (Fig. 3A). In stage 1, the storage cells had the same shape and ultrastructure as described  
194 for stage 0, but in their cytoplasm, single vacuoles and autophagosomes appeared (Fig. 3B).  
195 Accordingly, in the distinguished stage 2, the storage cells underwent severe vacuolization, and  
196 in their cytoplasm numerous autophagosomes were observed, and some of the autophagosomes  
197 were also disintegrated (Fig. 3C-D). Moreover, the cell membrane of some cells was degraded  
198 (Fig. 3D) and mitochondria had electron lucent matrix (Fig. 3C). The latter is observed for  
199 damaged mitochondria with impaired functionality (e.g. [53]), which and may result in cell  
200 death. All the stages were observed for tuns obtained by protocol B, i.e. out of 10 analysed tuns,  
201 five displayed features of stage 0, two of stage 1, and three of stage 2, whereas for tuns obtained  
202 by protocol A only stage 2 was observed (Fig. 1. Tab. 2). Interestingly, these observations

203 corroborated with the survival rate determined for tuns obtained by A and B protocols (Fig. 2).  
204 Thus, it could be assumed that only tuns without visible degeneration of storage cells appear to  
205 be able to successfully return to active life.

206 According to our knowledge, it is the first report indicating possibility of degeneration  
207 in *Hys. exemplaris* tuns of typical appearance, resulting in their decreased survival. Available  
208 data on *Hys. exemplaris* tuns of comparable duration [47] concern only tuns of classical cellular  
209 structure. Moreover, the functional state of anhydrobiotic *Hys. exemplaris* storage cells has not  
210 been studied yet although the cells are known to accumulate polysaccharides and lipids (e.g.  
211 [42]), and to be related to anhydrobiosis success because of their role of energy supplier (e.g.  
212 [19, 54]). We can assume that the observed damage to mitochondria may distinctly impair the  
213 role. However, it should be mentioned that in different tardigrade species the effect of  
214 anhydrobiosis on storage cells may be different as reflected by differences in changes of storage  
215 cells' size observed after dehydration [55]. Moreover, our data indicate that preconditioning is  
216 not a necessary element of *Hys. exemplaris* anhydrobiosis protocol as slow dehydration appears  
217 to provide even a better outcome. It should be remembered that application of different  
218 definitions of *Hys. exemplaris* recovery from the tun stage may hinder the comparison of the  
219 applied protocol effectiveness. For example there is a difference between “We defined  
220 recovered animals as those exhibiting spontaneous movements or at least responding to touch  
221 stimuli” [37] and the approach applied in this report, i.e. “coordinated movements of the body  
222 and legs (crawling)”. Additionally, some of the available papers do not contain clear definition  
223 of the recovery (e.g. [46]), estimation of survival rate [48] or the indication of time window for  
224 survival estimation following rehydration [39] as well as duration of anhydrobiosis [37, 39, 45,  
225 48].

226 Summing up, *Hys. exemplaris* is able to form tuns of typical appearance, but the process  
227 of internal degeneration decreases tun survival distinctly. Thus, the species does not appear to  
228 be a good model in anhydrobiosis research.

229

### 230 **Ethics approval and consent to participate**

231 Not applicable.

232

### 233 **Consent for publication**

234 Not applicable.



235

## 236 **Availability of data and materials**

237 Data generated and analyzed during this study are included in this published article.

238

## 239 **Competing interests**

240 The authors declare that they have no competing interests.

241

## 242 **Funding**

243 These studies were supported by the research grant of National Science Centre, Poland, NCN

244 2016/21/B/NZ4/00131.

245

## 246 **Authors' contributions**

247 IP, MR, ŁK and HK came up with research ideas. HK, IP and ŁK supervised the performed

248 analyses. IP, ŁK, TB, MR, AK and HK wrote the final version of the manuscript. ŁK, MR, TB,

249 AK and WE carried out the tardigrade cultures and collected animals for experiments. ŁK, TB,

250 WR, AK and MR performed experiments with anhydrobiosis. ŁC, IP, AK and MR prepared

251 microphotographs and figures. All authors read and approved the final manuscript.

252

## 253 **Acknowledgements**

254 These studies were supported by the research grant of National Science Centre, Poland,  
255 NCN 2016/21/B/NZ4/00131. The technical contribution of Kamil Janelt is highly appreciated.

256 Studies have been conducted in the framework of activities of BARg (Biodiversity and  
257 Astrobiology Research group).

258

## 259 **References**

260 1. Crowe JH, Hoekstra FA, Crowe LM. Anhydrobiosis. *Ann Rev Physiol.* 1992; 54: 579–599.

261 <https://doi.org/10.1146/annurev.ph.54.030192.003051>.

- 262 2. Watanabe M. Anhydrobiosis in invertebrates. *Appl Entomol Zool.* 2006; 41(1): 15–31.  
263 <https://doi.org/10.1303/aez.2006.15>.
- 264 3. Rebecchi L. Dry up and survive: the role of antioxidant defences in anhydrobiotic organisms.  
265 *J Limnol.* 2013; 72(Suppl. 1): 62–72. <https://doi.org/10.4081/jlimnol.2013.s1.e8>.
- 266 4. Arakawa K, Blaxter M. Life without water. *The Biochemist.* 2017; 39(6): 14–17.  
267 <https://doi.org/10.1042/BIO03906014>.
- 268 5. Kaczmarek Ł, Roszkowska M, Fontaneto D, Jezierska M, Pietrzak B, Wieczorek R, Poprawa  
269 I, Kosicki JZ, Karachitos A, Kmita H. Staying young and fit? Ontogenetic and  
270 phylogenetic consequences of animal anhydrobiosis. *J Zool.* 2019; 309(1): 1–11.  
271 <https://doi.org/10.1111/jzo.12677>.
- 272 6. Alpert P. Constraints of tolerance: why are desiccation-tolerant organisms so small or rare?  
273 *J Exp Biol.* 2006; 209(9): 1575–1584. <https://doi.org/10.1242/jeb.02179>.
- 274 7. Clegg JS. Cryptobiosis – a peculiar state of biological organization. *Comp. Biochem. Physiol*  
275 *B Biochem Mol Biol.* 2001; 128(4): 613–624. [https://doi.org/10.1016/s1096-](https://doi.org/10.1016/s1096-4959(01)00300-1)  
276 [4959\(01\)00300-1](https://doi.org/10.1016/s1096-4959(01)00300-1).
- 277 8. Hoekstra FA, Golovina EA, Buitink J. Mechanisms of plant desiccation tolerance. *Trends*  
278 *Plant Sci.* 2001; 6(9): 431–438. [https://doi.org/10.1016/s1360-1385\(01\)02052-0](https://doi.org/10.1016/s1360-1385(01)02052-0).
- 279 9. Wolkers WF, Tablin F, Crowe JH. From anhydrobiosis to freeze-drying of eukaryotic cells.  
280 *Comp Biochem Physiol A Mol Integr Physiol.* 2002; 131(3): 535–543.  
281 [https://doi.org/10.1016/s1095-6433\(01\)00505-0](https://doi.org/10.1016/s1095-6433(01)00505-0).
- 282 10. Schill RO, Mali B, Dandekar T, Schnölzer M, Reuter D, Frohme M. (2009) Molecular  
283 mechanisms of tolerance in tardigrades: new perspectives for preservation and  
284 stabilization of biological material. *Biotechnol Adv.* 2009; 27(4): 348–352.  
285 <https://doi.org/10.1016/j.biotechadv.2009.01.011>.
- 286 11. Crowe JH. Anhydrobiosis: An unsolved problem with applications in human welfare.  
287 *Subcell Biochem.* 2015; 71:263–280. [https://doi.org/10.1007/978-3-319-19060-0\\_11](https://doi.org/10.1007/978-3-319-19060-0_11).
- 288 12. Rapoport A, Turchetti B, Buzzini P. Application of anhydrobiosis and dehydration of yeasts  
289 for non-conventional biotechnological goals. *World J Microbiol Biotechnol.* 2016;  
290 32(6): 104. <https://doi.org/10.1007/s11274-016-2058-8>.
- 291 13. Jönsson KI. Radiation tolerance in tardigrades: Current knowledge and potential  
292 applications in medicine. *Cancers.* 2019; 11(9): 1333.  
293 <https://doi.org/10.3390/cancers11091333>.

- 294 14. Saragusty J, Loi P. Exploring dry storage as an alternative biobanking strategy inspired by  
295 nature. *Theriogenology*. 2019; 126: 17–27.  
296 <https://doi.org/10.1016/j.theriogenology.2018.11.027>.
- 297 15. Weng L, Stott SL, Toner M. Exploring dynamics and structure of biomolecules,  
298 cryoprotectants, and water using molecular dynamics simulations: implications for  
299 biostabilization and biopreservation. *Ann Rev Biomed Eng*. 2019; 21: 1–31.  
300 <https://doi.org/10.1146/annurev-bioeng-060418-052130>.
- 301 16. García AH. Anhydrobiosis in bacteria: from physiology to applications. *J Biosci*. 2011;  
302 36(5): 939–950. <https://doi.org/10.1007/s12038-011-9107-0>.
- 303 17. Rapoport A, Golovina EA, Gervais P, Dupont S, Beney L. Anhydrobiosis: Inside yeast  
304 cells. *Biotechnol Adv*. 2019; 37(1): 51–67.  
305 <https://doi.org/10.1016/j.biotechadv.2018.11.003>.
- 306 18. Watanabe M, Kikawada T, Minagawa N, Yukuhiro F, Okuda T. Mechanism allowing an  
307 insect to survive complete dehydration and extreme temperatures. *J Exp Biol*. 2002;  
308 2799–2802.
- 309 19. Schill RO, Hengherr S. Environmental adaptations: Desiccation tolerance. In: Schill OR,  
310 editor. *Water bears: The biology of tardigrades*. Springer: Berlin; 2018. pp. 273–294.  
311 <https://doi.org/10.1007/978-3-319-95702-9>.
- 312 20. Crowe JH. The physiology of cryptobiosis in tardigrades. *Mem Ist Ital Idrobiol*. 1975;  
313 (Suppl.) 32: 37–59.
- 314 21. Wright JC, Westh P, Ramløv H. Cryptobiosis in Tardigrada. *Biol Rev*. 1992; 67(1): 1–29.  
315 <https://doi.org/10.1111/j.1469-185X.1992.tb01657.x>.
- 316 22. Halberg KA, Jørgensen A, Møbjerg N. Desiccation tolerance in the tardigrade *Richtersius*  
317 *coronifer* relies on muscle mediated structural reorganization. *PLOS ONE*. 2013; 8(12):  
318 e85091. <https://doi.org/10.1371/journal.pone.0085091>.
- 319 23. Nelson DR, Guidetti R, Rebecchi L. Phylum Tardigrada. In: Thorp J, Rogers DC, editors.  
320 *Ecology and general biology: Thorp and Covich's Freshwater invertebrates*. Academic  
321 Press: Cambridge; 2015. pp. 347–80. [https://doi.org/10.1016/B978-0-12-385026-](https://doi.org/10.1016/B978-0-12-385026-3.00017-6)  
322 [3.00017-6](https://doi.org/10.1016/B978-0-12-385026-3.00017-6).
- 323 24. Czerneková M, Jönsson KI, Chajec L, Student S, Poprawa I. The structure of the desiccated  
324 *Richtersius coronifer* (Richters, 1903). *Protoplasma*. 2017; 254(3): 1367–1377.  
325 <https://doi.org/10.1007/s00709-016-1027-2>.
- 326 25. Czerneková M, Janelt K, Student S, Jönsson KI, Poprawa I. (2018) A comparative  
327 ultrastructure study of storage cells in the eutardigrade *Richtersius coronifer* in the

- 328 hydrated state and after desiccation and heating stress. PLOS ONE. 2018; 13(8):  
329 e0201430. <https://doi.org/10.1371/journal.pone.0201430>.
- 330 26. Møbjerg N, Neves RC. New insights into survival strategies of tardigrades. Comp Biochem  
331 Physiol A Mol Integr Physiol. 2020; 254: 110890.  
332 <https://doi.org/10.1016/j.cbpa.2020.110890>.
- 333 27. Gąsiorek P, Stec D, Morek W, Michalczyk Ł. An integrative redescription of *Hypsibius*  
334 *dujardini* (Doyère, 1840), the nominal taxon for Hypsibioidea (Tardigrada:  
335 Eutardigrada). Zootaxa. 2018; 4415(1): 45–75.  
336 <https://doi.org/10.11646/zootaxa.4415.1.2>.
- 337 28. Doyère LMF. Memoire sur les Tardigrades. I. Annls Sci Nat Paris. 1840; 14: 269–362.
- 338 29. Bertolani R, Kinchin IM. A new species of *Ramazzottius* (Tardigrada, Hypsibiidae) in a  
339 rain gutter sediment from England. Zool J Linn Soc. 1993; 109: 327–333.
- 340 30. Koutsovoulos G, Kumar S, Laetsch DR, Stevens L, Daub J, Conlon C, Maroon H, Thomas  
341 F, Aboobaker AA, Blaxter M. No evidence for extensive horizontal gene transfer in the  
342 genome of the tardigrade *Hypsibius dujardini*. PNAS. 2016; 113(18): 5053–5058.  
343 <https://doi.org/10.1073/pnas.1600338113>.
- 344 31. Arakawa K, Yoshida Y, Tomita M. Genome sequencing of a single tardigrade *Hypsibius*  
345 *dujardini* individual. Sci Data. 2016; 3, 160063 <https://doi.org/10.1038/sdata.2016.63>.
- 346 32. Hashimoto T, Horikawa DD, Saito Y, Kuwahara H, Kozuka-Hata H, Shin-I T, Minakuchi  
347 Y, Ohishi K, Motoyama A, Aizu T, Enomoto A, Kondo K, Tanaka S, Hara Y,  
348 Koshikawa S, Sagara H, Miura T, Yokobori SI, Miyagawa K, Suzuki Y, Kubo T, Oyama  
349 M, Kohara Y, Fujiyama A, Arakawa K, Katayama T, Toyoda A, Kunieda T.  
350 Extremotolerant tardigrade genome and improved radiotolerance of human cultured  
351 cells by tardigrade-unique protein. Nat Commun. 2016; 7: 12808.  
352 <https://doi.org/10.1038/ncomms12808>.
- 353 33. Degma P, Bertolani R, Guidetti R. Actual checklist of Tardigrada species (2009–2021, 40<sup>th</sup>  
354 Edition: 19-07-2021). 2009–2021; Available from:  
355 <https://iris.unimore.it/retrieve/358743/Actual%20checklist%20of%20Tardigrada%2040th%20Edition%2019-07-21.pdf>  
356
- 357 34. Hibshman JD, Clegg JS, Goldstein B. Mechanisms of desiccation tolerance: themes and  
358 variations in brine shrimp, roundworms, and tardigrades. Front Physiol. 2020; 11:  
359 592016. <https://doi.org/10.3389/fphys.2020.592016>.

- 360 35. Hesgrove C, Boothby TC. The biology of tardigrade disordered proteins in extreme stress  
361 tolerance. *Cell Commun Signal*. 2020; 18(1): 178. [https://doi.org/10.1186/s12964-020-](https://doi.org/10.1186/s12964-020-00670-2)  
362 [00670-2](https://doi.org/10.1186/s12964-020-00670-2).
- 363 36. Kamilari M, Jørgensen A, Schiøtt M, Møbjerg N. Comparative transcriptomics suggest  
364 unique molecular adaptations within tardigrade lineages. *BMC Genomics*. 2019; 20(1):  
365 607. <https://doi.org/10.1186/s12864-019-5912-x>.
- 366 37. Kondo K, Kubo T, Kunieda T. Suggested involvement of PP1/PP2A activity and de novo  
367 gene expression in anhydrobiotic survival in a tardigrade, *Hypsibius dujardini*, by  
368 chemical genetic approach. *PLOS ONE*. 2015; 10(12): e0144803.  
369 <https://doi.org/10.1371/journal.pone.0144803>.
- 370 38. Bemm F, Weiß CL, Schultz J, Förster F. Genome of a tardigrade: Horizontal gene transfer  
371 or bacterial contamination? *PNAS*. 2016; 113(22): E3054-6.  
372 <https://doi.org/10.1073/pnas.1525116113>.
- 373 39. Yoshida Y, Koutsovoulos G, Laetsch DR, Stevens L, Kumar S, Horikawa DD, Ishino K,  
374 Komine S, Kunieda T, Tomita M, Blaxter M, Arakawa K. Comparative genomics of the  
375 tardigrades *Hypsibius dujardini* and *Ramazzottius varieornatus*. *PLOS Biol*. 2017;  
376 15(7): e2002266. <https://doi.org/10.1371/journal.pbio.2002266>.
- 377 40. Erdmann W, Idzikowski B, Kowalski W, Szymański B, Kosicki JZ, Kaczmarek Ł. Can the  
378 tardigrade *Hypsibius dujardini* survive in the absence of the geomagnetic field?. *PLOS*  
379 *ONE*. 2017; 12(9): e0183380. <https://doi.org/10.1371/journal.pone.0183380>.
- 380 41. Hyra M, Poprawa I, Włodarczyk A, Student S, Sonakowska L, Kszuk-Jendrysik M, Rost-  
381 Roszkowska MM. Ultrastructural changes in the midgut epithelium of *Hypsibius*  
382 *dujardini* (Doyère, 1840) (Tardigrada, Eutardigrada, Hypsibiidae) in relation to  
383 oogenesis. *Zool J Linn Soc*. 2016a; 178, 897–906. <https://doi.org/10.1111/zoj.12467>.
- 384 42. Hyra M, Rost-Roszkowska MM, Student S, Włodarczyk A, Deperas M, Janelt K, Poprawa  
385 I. Body cavity cells of Parachela during their active life. *Zool J Linn Soc*. 2016b; 178(4):  
386 878–887. <https://doi.org/10.1111/zoj.12463>.
- 387 43. Stone J, Vasanthan T. Life history traits for the freshwater tardigrade species *Hypsibius*  
388 *exemplaris* reared under laboratory conditions. *JWB*. 2020; 4(2): 65–72.  
389 <https://doi.org/10.22120/jwb.2020.96855.1037>.
- 390 44. Jezierska M, Miernik A, Sojka J, Student S, Śliwińska MA, Poprawa I. Oogenesis in the  
391 tardigrade *Hypsibius exemplaris* Gąsiorek, Stec, Morek & Michalczyk, 2018  
392 (Eutardigrada, Hypsibiidae). *Micron*. 2021; 150(1/3): 103126.  
393 <https://doi.org/10.1016/j.micron.2021.103126>.

- 394 45. Wright JC. Desiccation tolerance and water-retentive mechanisms in tardigrades. J Exp  
395 Biol. 1989; 142: 267–292.
- 396 46. Kuzmic M, Richaud M, Cuq P, Frelon S, Galas S. Carbonylation accumulation of the  
397 *Hypsibius exemplaris* anhydrobiote reveals age-associated marks. PLOS ONE. 2018;  
398 13(12): e0208617. <https://doi.org/10.1371/journal.pone.0208617>.
- 399 47. Richaud M, Le Goff E, Cazevielle C, Ono F, Mori Y, Saini NL, Cuq P, Baghdiguan S,  
400 Godefroy N, Galas S. Ultrastructural analysis of the dehydrated tardigrade *Hypsibius*  
401 *exemplaris* unveils an anhydrobiotic-specific architecture. Sci Rep. 2020; 10(1): 4324.  
402 <https://doi.org/10.1038/s41598-020-61165-1>
- 403 48. Horikawa DD, Cumbers J, Sakakibara I, Rogoff D, Leuko S, Harnoto R, Arakawa K,  
404 Katayama T, Kunieda T, Toyoda A, Fujiyama A, Rothschild LJ. Analysis of DNA  
405 Repair and Protection in the Tardigrade *Ramazzottius varieornatus* and *Hypsibius*  
406 *dujardini* after Exposure to UVC Radiation. PLOS ONE. 2013; 8(6): e64793.  
407 <https://doi.org/10.1371/journal.pone.0064793>.
- 408 49. Boothby TC. Desiccation of *Hypsibius exemplaris*. Cold Spring Harb Protoc. 2018; 11.  
409 <https://doi.org/10.1101/pdb.prot102327>.
- 410 50. Roszkowska M, Gołdyn B, Wojciechowska D, Kosicki JZ, Fiałkowska E, Kmita H,  
411 Kaczmarek Ł. Tolerance to anhydrobiotic conditions among two coexisting tardigrade  
412 species differing in life strategies. Zool Stud. in press.
- 413 51. Beyerinck [Beijerinck] MW. Culturversuche mit Zoochlorellen, Lichenengonidien und  
414 anderen niederen Algen. Bot Ztg. 1890; 47: 725–785.
- 415 52. Roszkowska M, Wojciechowska D, Kmita H, Cerbin S, Dziuba MK, Fiałkowska E,  
416 Sobkowiak R, Szydło W, Kaczmarek Ł. Tips and tricks how to culture water bears:  
417 simple protocols for culturing eutardigrades (Tardigrada) under laboratory conditions.  
418 Eur Zool J. 2021; 88(1): 449–465. <https://doi.org/10.1080/24750263.2021.1881631>.
- 419 53. Rybka V, Suzuki VJ, Gavrish AS, Dibrova VA, Gychka SG, Shults NV. Transmission  
420 Electron Microscopy Study of Mitochondria in Aging Brain Synapses. Antioxidants.  
421 2019; 8(171). <https://doi.org/10.3390/antiox8060171>.
- 422 54. Bertolani R, Rebecchi L. Cytology and cytogenetics. In: Schill OR, editor. Water bears:  
423 The biology of tardigrades. Springer: Berlin; 2018. pp. 145–162.  
424 <https://doi.org/10.1007/978-3-319-95702-9>.
- 425 55. Reuner A, Hengherr S, Brümmer F, Schill RO. Comparative studies on storage cells in  
426 tardigrades during starvation and anhydrobiosis. Curr. Zool. 2010; 56(2): 259–263.  
427 <https://doi.org/10.1093/czoolo/56.2.259>.

428 **Figures**

429 **Figure 1. Scheme of the experimental setup of A and B protocols used for ultrastructural**  
430 **analyzes.** Protocol A is represented by the sketch of preconditioning procedure and protocol B  
431 by a plate used for slow dehydration. **A.** small plastic box with lid; **B.** 2% agar-coated lids of  
432 Petri dishes (“agar plates”); **C.** scaffold for agar plates; **D.** a glass watch dish containing 10%  
433 glycerol solution; **E-F.** digital hygrometer; TEM, transmission electron microscopy; 0, 1 and 2,  
434 the distinguished three stages of degeneration of typical tuns.

435

436 **Figure 2. Survival rate of *Hys. exemplaris* specimens after 7 days in tun stage.** The survival  
437 rate corresponds to percentage of specimens able to return to full activity after 24 h following  
438 rehydration. A, B, C1 and C2 - symbols assigned to applied anhydrobiosis protocols. A,  
439 preconditioning on agar; B, slow dehydration on filter paper; C1, environmental drying in moist  
440 sand; C2, environmental drying in pond sediment. Data represent mean values  $\pm$  SEM (see also  
441 Table 1).

442

443 **Figure 3. Ultrastructure of storage cells in tuns of *Hys. exemplaris*, TEM.** **A.** Storage cells  
444 in stage 0 – tuns with no signs of degeneration: m- mitochondrion, rm- reserve material, sc –  
445 storage cell, arrow – cisternae of rough endoplasmic reticulum, scale = 0.38  $\mu$ m; **B.** Storage  
446 cells in stage 1– tuns with the first signs of degeneration: au– autophagosome, m-  
447 mitochondrion, rm- reserve material, sc – storage cell, v- vacuole, scale = 0.53  $\mu$ m; **C-D.**  
448 Storage cells in stage 2– tuns with highly advanced degeneration: au– autophagosome, m-  
449 mitochondrion, rm- reserve material, sc – storage cell, v– vacuole, arrow– degraded cell  
450 membrane; **C.** scale = 0.36  $\mu$ m; **D.** scale = 0.42  $\mu$ m (see also Table 2).

451

452 **Tables**

453 **Table 1.** Summary of the applied anhydrobiosis protocols.

| <b>Protocol</b> | <b>Quantitative details</b>                                     | <b>Mode of dehydration</b> | <b>Substratum</b>      |
|-----------------|-----------------------------------------------------------------|----------------------------|------------------------|
| A.              | 10 repeats, each for 20 individuals<br>(20 specimens per plate) | preconditioning            | agar layer             |
| B.              | 5 repeats, each for 50 individuals<br>(10 specimens per plate)  | slow dehydration           | filter paper           |
| C1.             | 5 repeats, each for 50 individuals<br>(50 specimens per plate)  | environmental drying       | moist sand             |
| C2.             | 5 repeats, each for 50 individuals<br>(50 specimens per plate)  | environmental drying       | sediment from the pond |

454

455 **Table 2.** Summary of ultrastructural analysis of typical tuns based on storage cells. The analysis was performed  
456 for 10 randomly selected typical tuns obtained using protocols A and B.

| <b>Protocol</b> | <b>degeneration stage</b> | <b>Description</b>           | <b>Approx. percentage [%]</b> |
|-----------------|---------------------------|------------------------------|-------------------------------|
| A               | 2                         | highly advanced degeneration | 100                           |
| B               | 0                         | no signs of degeneration     | 50                            |
|                 | 1                         | first signs of degradation   | 20                            |
|                 | 2                         | highly advanced degeneration | 30                            |

457



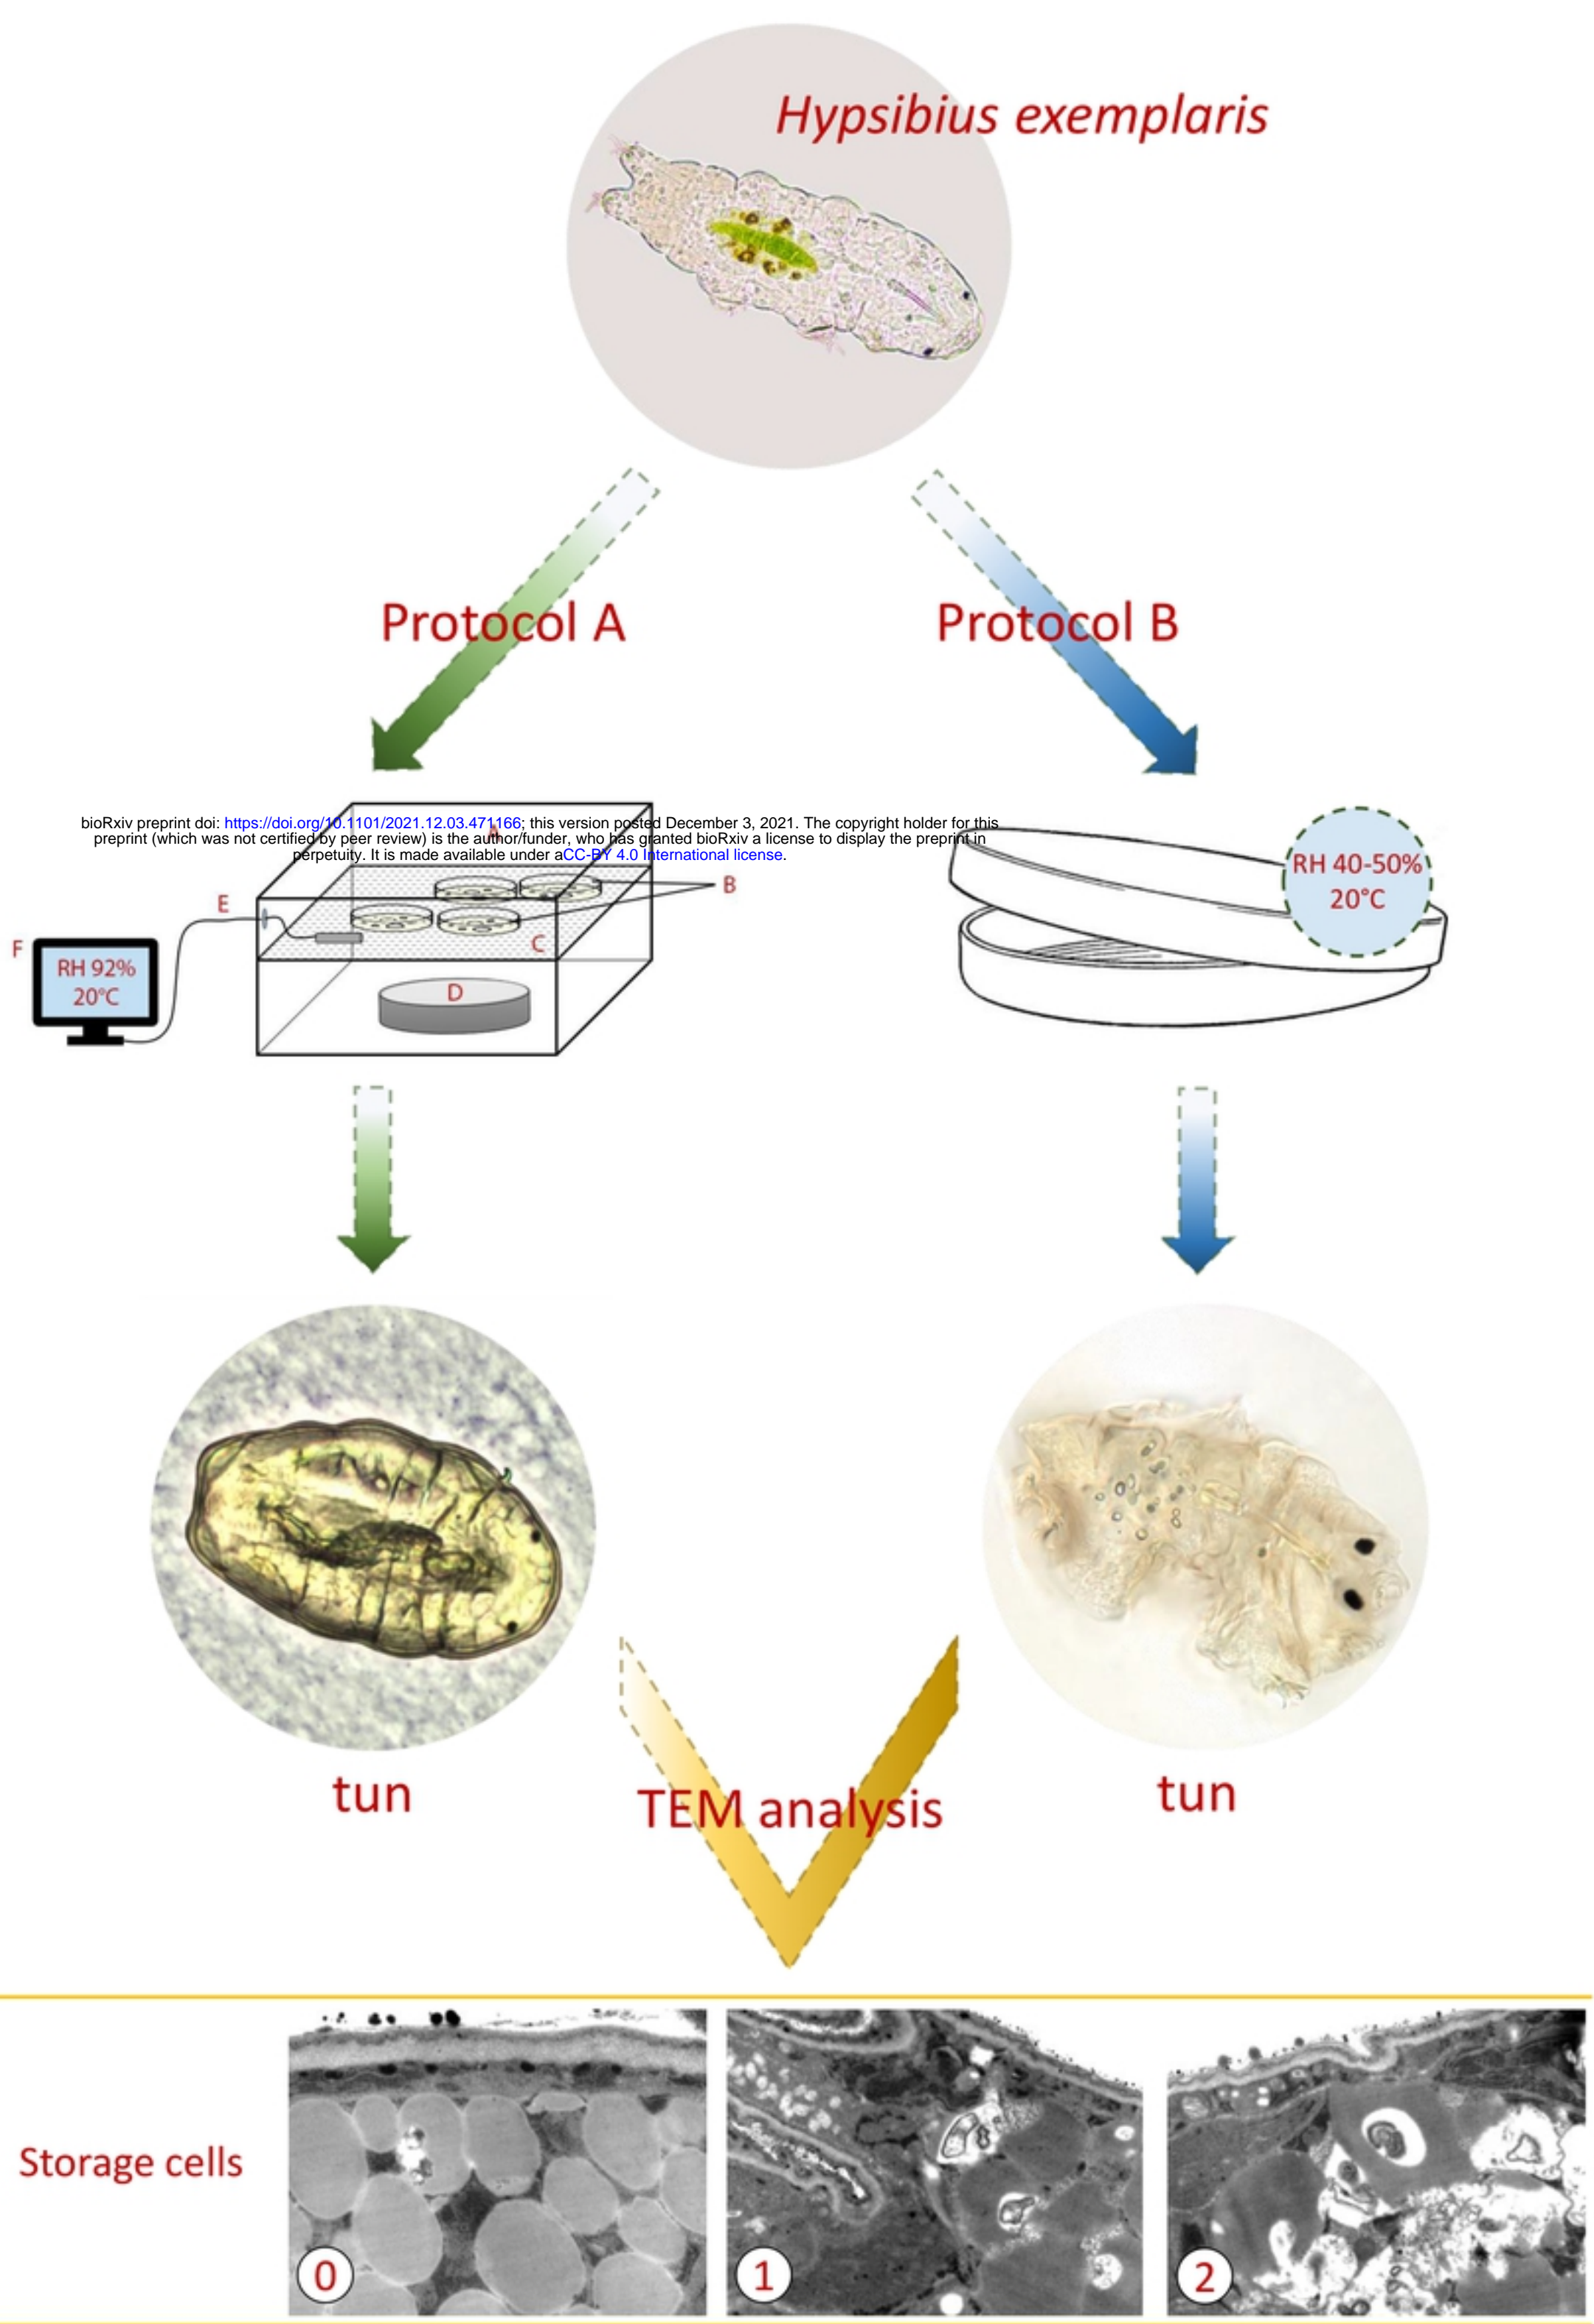

bioRxiv preprint doi: <https://doi.org/10.1101/2021.12.03.471166>; this version posted December 3, 2021. The copyright holder for this preprint (which was not certified by peer review) is the author/funder, who has granted bioRxiv a license to display the preprint in perpetuity. It is made available under aCC-BY 4.0 International license.

Figure 1

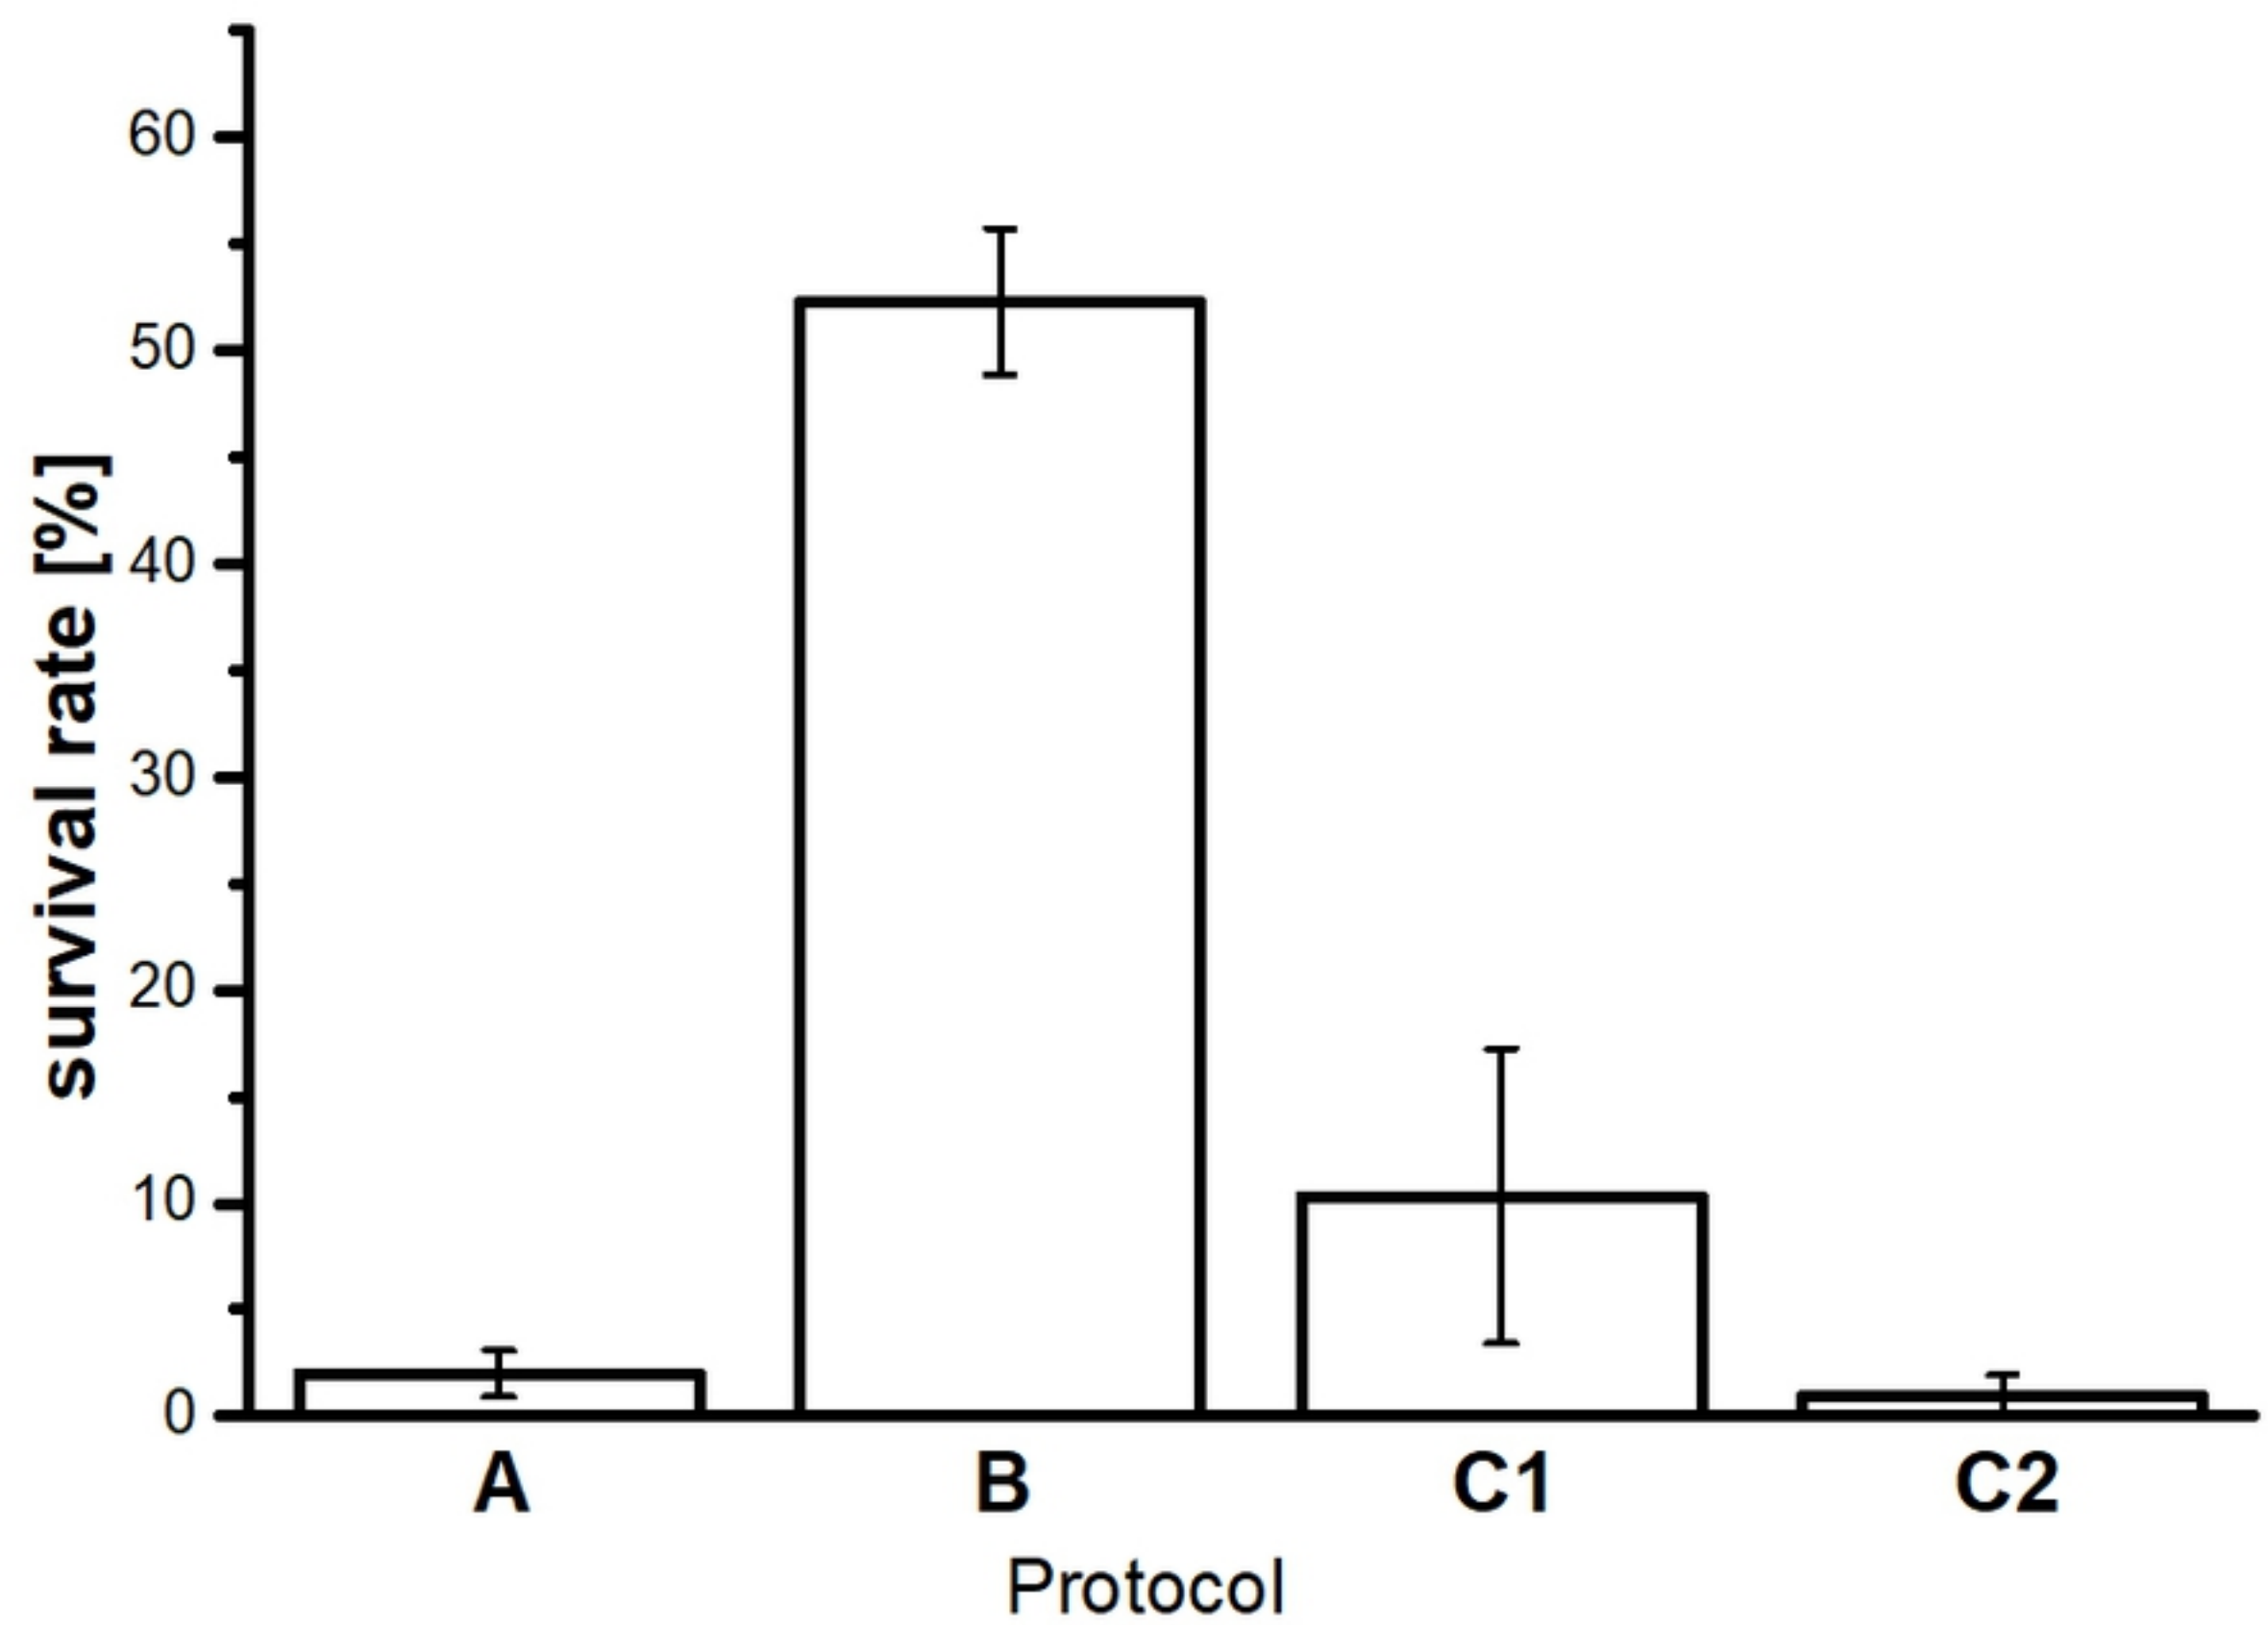

Figure 2

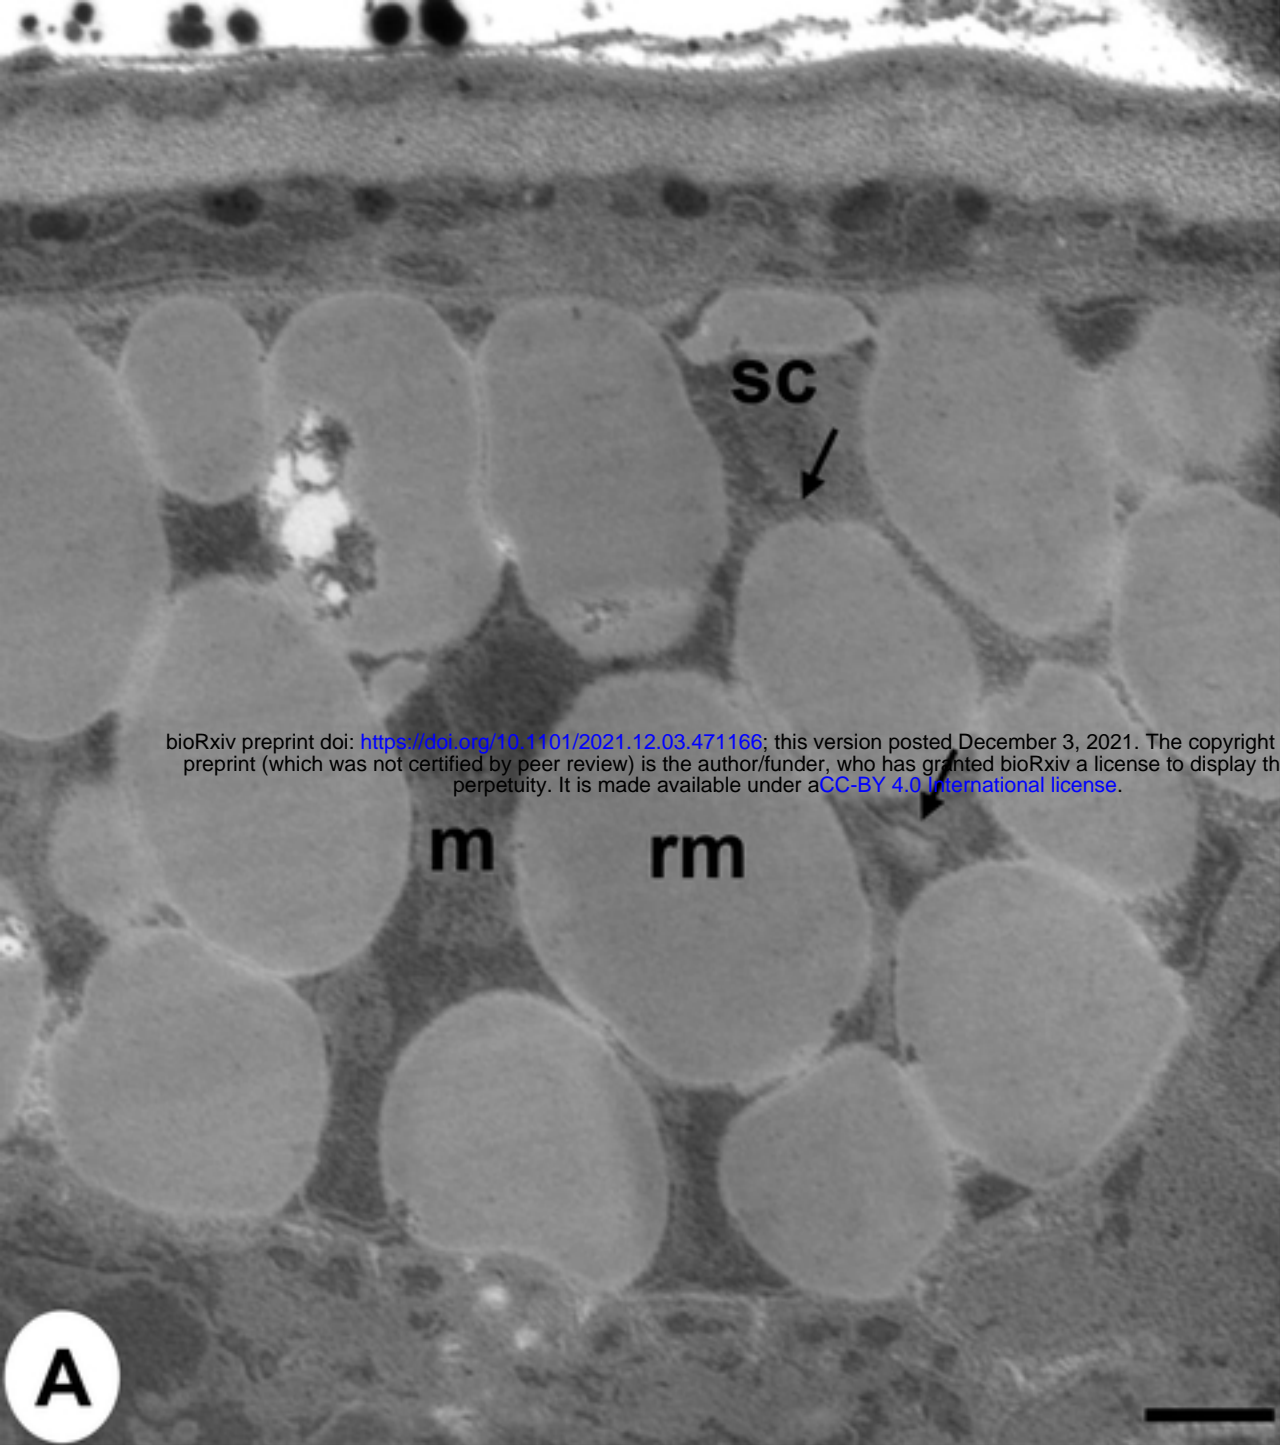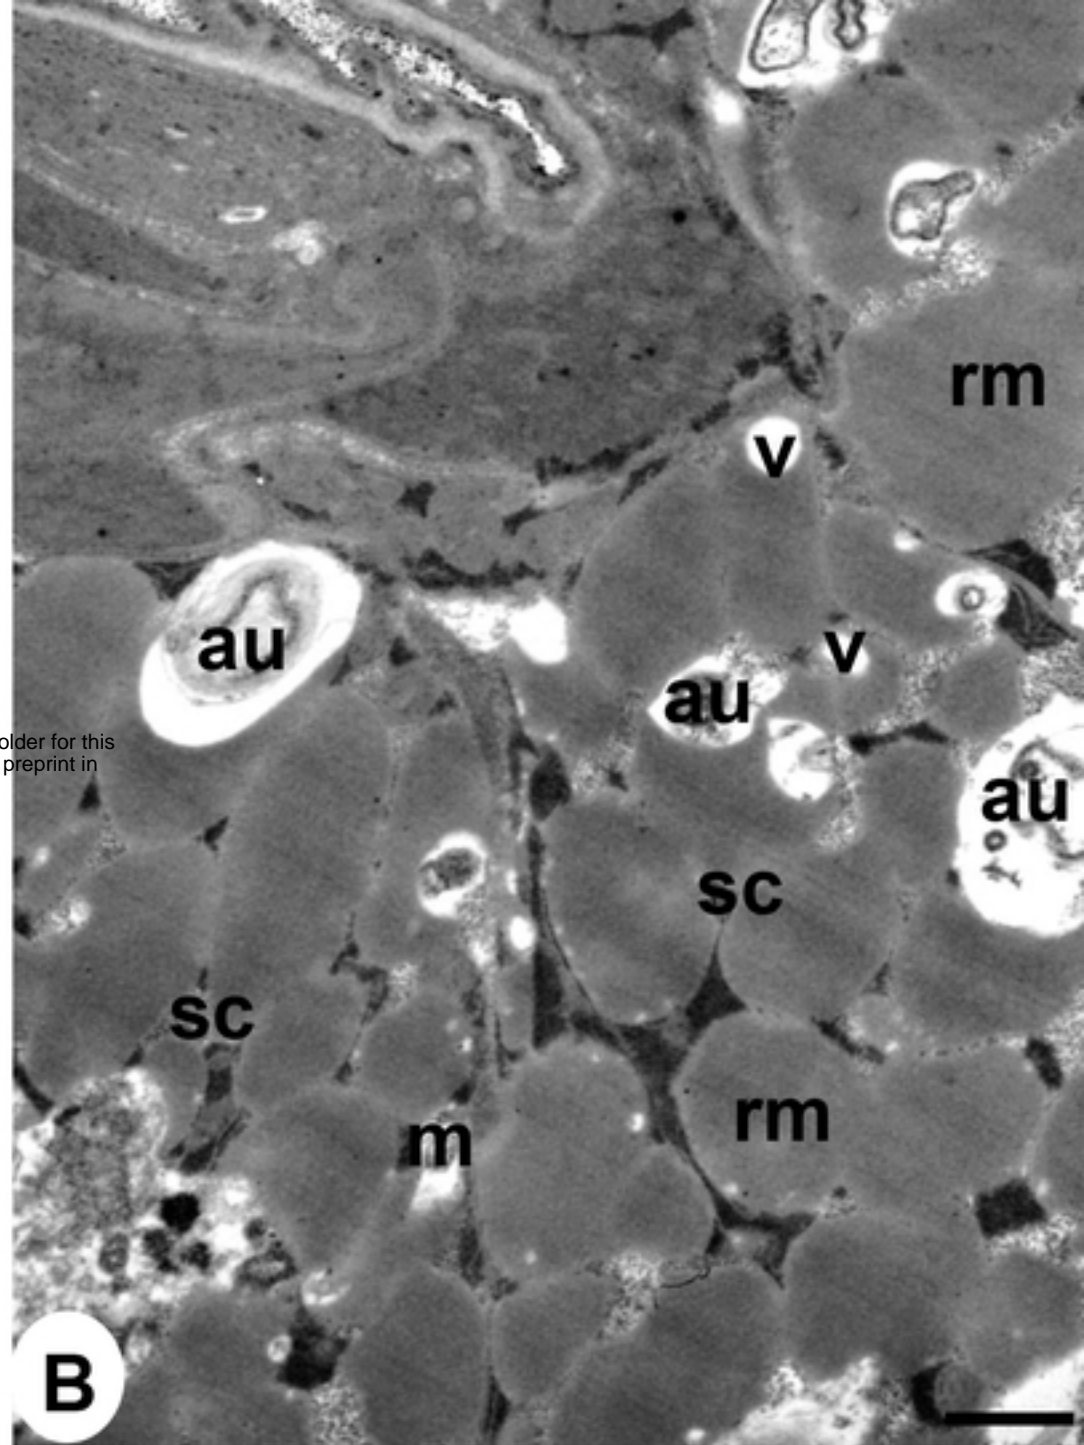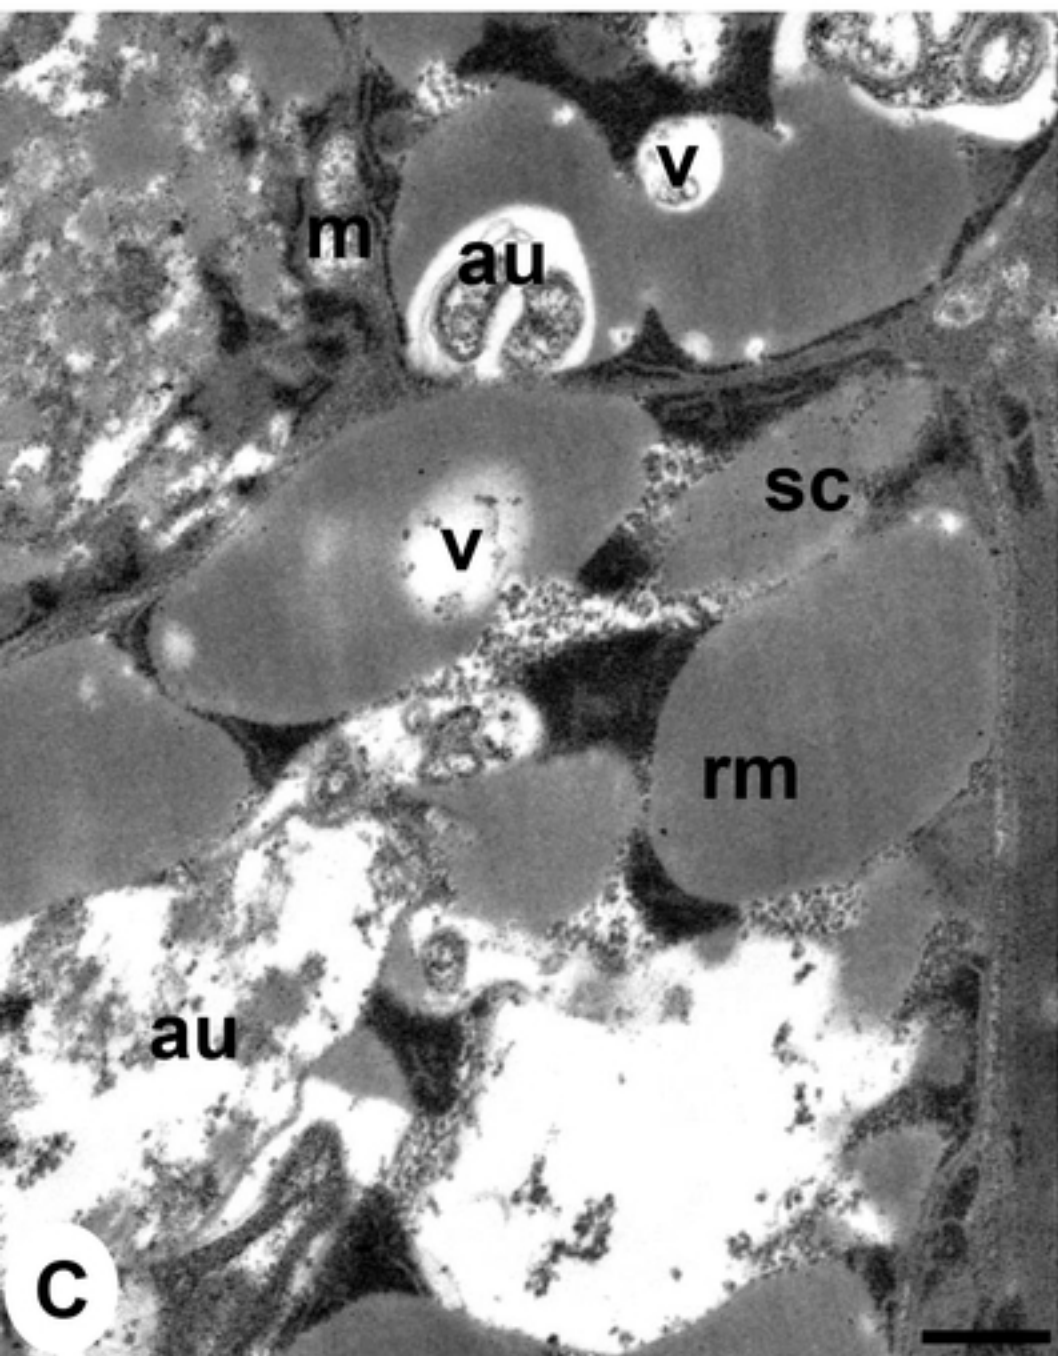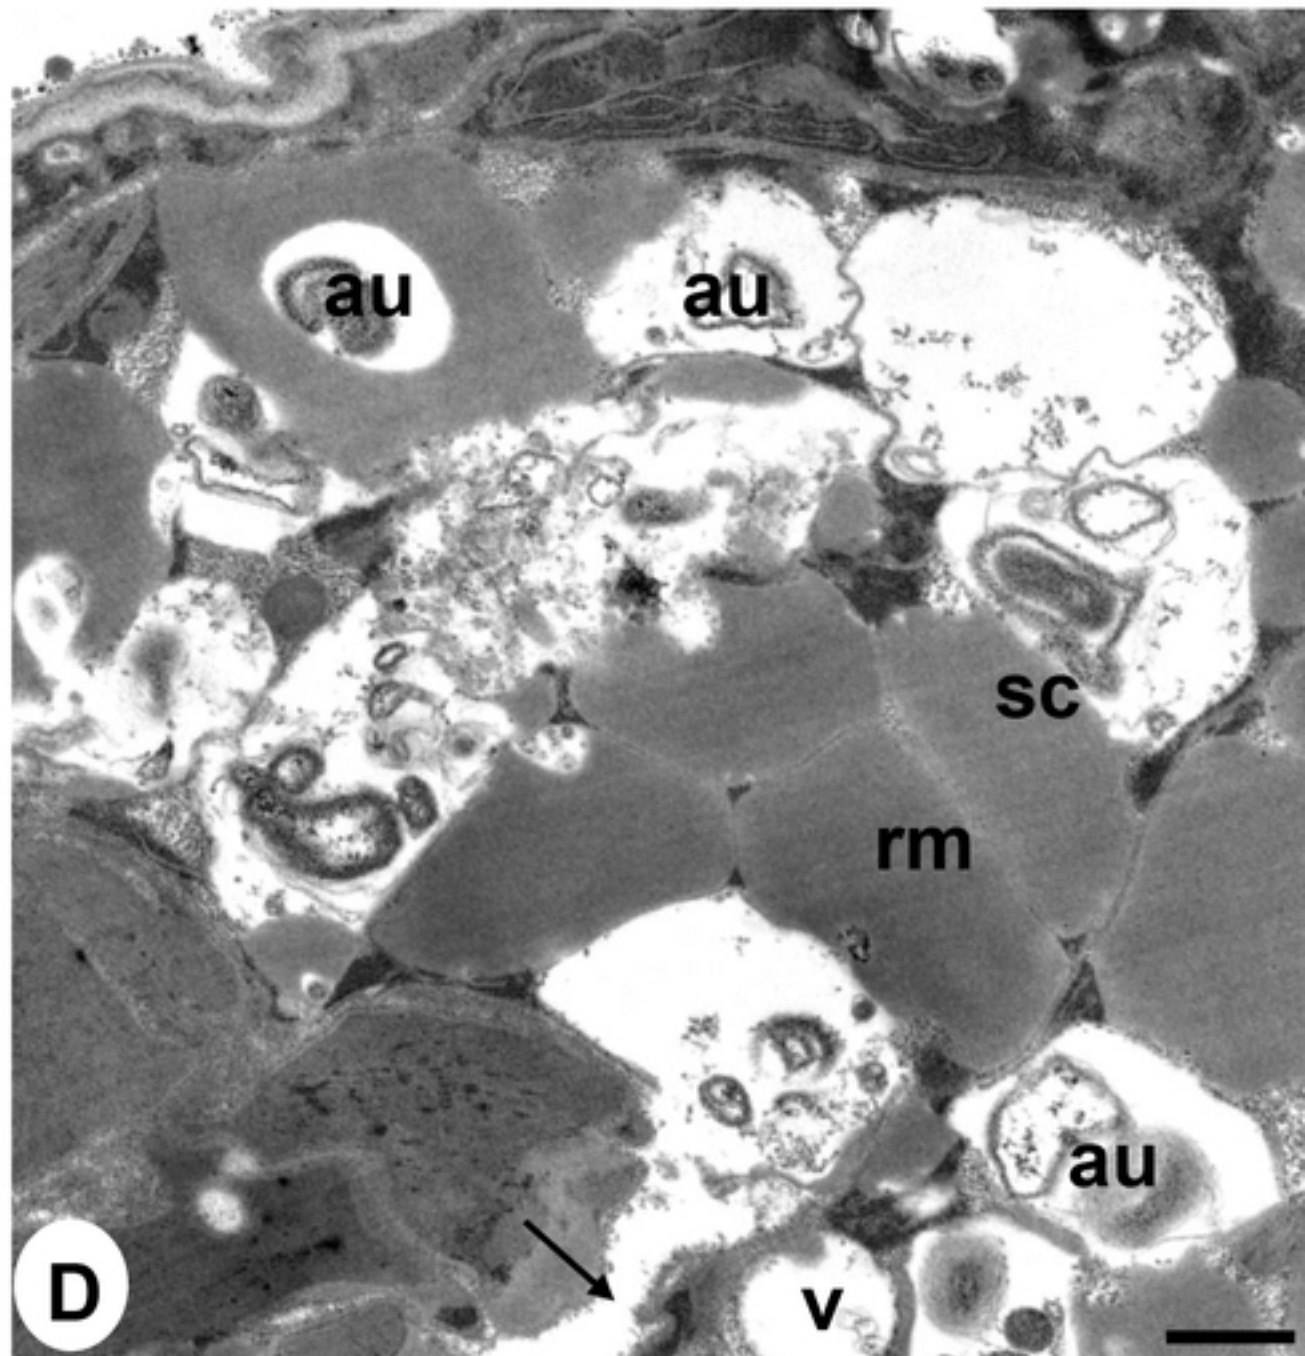

Figure
